# Supplementary material
Source: publisher site journal article supplement (https://www.dovepress.com/article/604892)
Supplement: Supplementary file 1 [file 604892%20Revised%20Supplementary%20Materials.docx]

**Supplementary Materials**

**Table S1.** Hyperparameter settings of the evaluated machine learning models.

| Method | Hyperparameters |
| --- | --- |
| LR | intercept_scaling = 1, max_iter = 100,  penalty = l2, solver = lbfgs, tol = 0.0001, verbose = 0 |
| Decision Tree | criterion = entropy, max_depth = 4, max_features = sqrt,  max_leaf_nodes = None, min_samples_leaf = 10,  min_samples_split = 2, splitter = best |
| SGD | alpha = 0.0001, epsilon = 0.1, fit_intercept = True, l1_ratio = 0.5, learning_rate = optimal, loss = log_loss, max_iter = 10000, n_iter_no_change = 5, penalty = elasticnet, power_t = 0.5, shuffle = True, tol = 0.001, validation_fraction = 0.1, verbose = 0 |
| SVM | C=1.0, cache_size = 200, decision_function_shape = ovr,  degree = 3, gamma = scale, kernel = rbf, max_iter = -1,  probability = True, shrinking = True, tol = 0.001 |
| MLP | activation = relu, alpha = 0.0001, batch_size = 256, beta_1 = 0.9, beta_2 = 0.999, early_stopping = False, epsilon = 1e-08, hidden_layer_sizes = (10, 10, 10, 10), learning_rate_init = 0.001, max_fun = 15000, max_iter = 300, momentum = 0.9, n_iter_no_change = 10, solver = adam, tol = 0.0001 |
| KNN | algorithm = auto, leaf_size = 30, metric = minkowski,  metric_params = None, n_neighbors = 5, weights = uniform |
| ANN | layer = 6, activation = ReLU and sigmoid, optimizer = adam, loss = binary_crossentropy, metrics = accuracy, epochs = 100, batch_size = 64, verbose = 2, Earlystopping(monitor = val_loss, patience = 100, restore_best_weights = True) |
| XGBoost | objective = binary:logistic |
| LightGBM | boosting_type = gbdt, colsample_bytree = 1.0, max_depth = -1, min_child_samples = 20, min_child_weight = 0.001,  n_estimators=1000, num_leaves=64, learning_rate = 0.1,  subsample=1.0, subsample_for_bin=200000, subsample_freq=0 |
| Random Forest | bootstrap = True, criterion = gini, max_depth = None,  max_features = sqrt, max_leaf_nodes = None, verbose=0,  max_samples = None, min_samples_leaf = 1,  min_samples_split = 2, n_estimators = 100 |
| **Abbreviations:** LR, Logistic Regression; SGD, Stochastic Gradient Descent; SVM, Support Vector Machine; MLP, Multilayer Perceptron; KNN, K-Nearest Neighbors; ANN, Artificial Neural Network; XGBoost, eXtreme Gradient Boosting; LightGBM, Light Gradient Boosting Machine. | |

**Table S2.** Distribution of outcome and clinical features across the stratified five-fold cross-validation.

| **Features** | **Fold 1** | **Fold 2** | **Fold 3** | **Fold 4** | **Fold 5** |
| --- | --- | --- | --- | --- | --- |
| Patients | 31 | 31 | 30 | 30 | 30 |
| Absence of  MASLD (0) | 19 (61.29%) | 19 (61.29%) | 19 (63.33%) | 19 (63.33%) | 19 (63.33%) |
| Presence of MASLD (1) | 12 (38.71%) | 12 (38.71%) | 11 (36.67%) | 11 (36.67%) | 11 (36.67%) |
| Female (0) | 14 (45.16%) | 18 (58.06%) | 12 (40.00%) | 11 (36.67%) | 12 (40.00%) |
| Male (1) | 17 (54.84%) | 13 (41.94%) | 18 (60.00%) | 19 (63.33%) | 18 (60.00%) |
| Age (years) | 56.52 ± 11.96 | 59.16 ± 10.89 | 58.87 ± 10.85 | 55.00 ± 11.89 | 51.33 ± 15.55 |
| BMI (kg/m2) | 24.32 ± 3.93 | 24.26 ± 3.36 | 24.76 ± 3.82 | 24.60 ± 4.28 | 24.54 ± 3.92 |
| Waist (cm) | 84.69 ± 10.96 | 84.26 ± 8.92 | 86.50 ± 10.22 | 85.82 ± 11.05 | 86.40 ± 12.30 |
| Body fat composition (%) | 24.07 ± 6.06 | 27.74 ± 5.63 | 25.55 ± 6.01 | 25.59 ± 6.44 | 24.99 ± 6.06 |
| AST (U/L) | 22.19 ± 7.89 | 24.71 ± 11.56 | 22.20 ± 9.15 | 22.90 ± 7.79 | 21.93 ± 7.38 |
| ALT (U/L) | 23.52 ± 16.37 | 24.71 ± 14.21 | 21.33 ± 16.28 | 25.07 ± 12.71 | 24.40 ± 16.67 |
| GGT (U/L) | 47.81 ± 133.28 | 28.06 ± 50.11 | 20.60 ± 11.81 | 31.27 ± 35.09 | 27.20 ± 19.04 |
| BilT (mg/dL) | 1.06 ± 0.51 | 1.04 ± 0.56 | 1.01 ± 0.36 | 0.90 ± 0.34 | 0.95 ± 0.30 |
| TG (mg/dL) | 124.10 ± 68.50 | 113.94 ± 62.20 | 122.10 ± 48.41 | 140.27 ± 98.35 | 160.30 ± 251.26 |
| Platelets (10^9/L) | 257.84 ± 69.34 | 249.90 ± 62.91 | 253.90 ± 61.57 | 259.53 ± 55.66 | 272.83 ± 68.36 |
| Albumin (g/dL) | 4.51 ± 0.29 | 4.52 ± 0.18 | 4.55 ± 0.23 | 4.46 ± 0.57 | 4.54 ± 0.26 |
| HbA1c (%) | 5.65 ± 0.57 | 6.06 ± 0.54 | 6.01 ± 0.72 | 5.99 ± 0.77 | 5.82 ± 0.60 |
| FLI | 31.81 ± 28.36 | 26.10 ± 24.00 | 30.44 ± 23.35 | 34.15 ± 28.67 | 34.88 ± 30.46 |
| FIB-4 | 1.18 ± 0.52 | 1.30 ± 0.58 | 1.24 ± 0.42 | 1.09 ± 0.48 | 1.01 ± 0.69 |
| NFS | -1.94 ± 1.62 | -1.42 ± 1.20 | -1.42 ± 1.31 | -1.90 ± 1.19 | -2.28 ± 1.60 |
| HSI | 32.57 ± 6.56 | 32.32 ± 4.80 | 32.26 ± 4.96 | 33.58 ± 6.57 | 33.31 ± 6.87 |
